# Supplementary material for: Carboxamide and carbamate substituted π-conjugated polymers: the effect of hydrogen bonding on photovoltaic properties
Source: Royal Society of Chemistry journal article supplement (doi:10.1039/d2py01329k), 2023-01-01
Supplement: d2py01329k1.pdf [file d2py01329k1.pdf]

## Supporting Information

### Carboxamide and carbamate substituted $\pi$ -conjugated polymers: the effect of hydrogen bonding on photovoltaic properties

Wei Yang,<sup>a</sup> Dayong Zhang,<sup>b</sup> Junsheng Yu\*<sup>b</sup> and Qing Zhang\*<sup>a</sup>

<sup>a</sup>Shanghai Key Laboratory of Electrical Insulation and Thermal Aging, School of Chemistry and Chemical Engineering, Shanghai Jiaotong University, 800 Dongchuan Road, Shanghai, China

<sup>b</sup>State Key Laboratory of Electronic Thin Films and Integrated Devices, School of Optoelectronic Science and Engineering, University of Electronic Science and Technology of China (UESTC), Chengdu 610054, P. R. China

|                                                                                 |    |
|---------------------------------------------------------------------------------|----|
| 1. NMR and Mass Spectra of Compounds.....                                       | 1  |
| 2. Crystallographic Results .....                                               | 12 |
| 3. Thermal Analyses of Polymers .....                                           | 14 |
| 4. Ultraviolet photoelectron spectroscopy (UPS).....                            | 14 |
| 5. Photovoltaic Device Parameters .....                                         | 15 |
| 6. Two-dimensional grazing incidence wide-angle X-ray scattering analysis ..... | 15 |

#### 1. NMR and Mass Spectra of Compounds

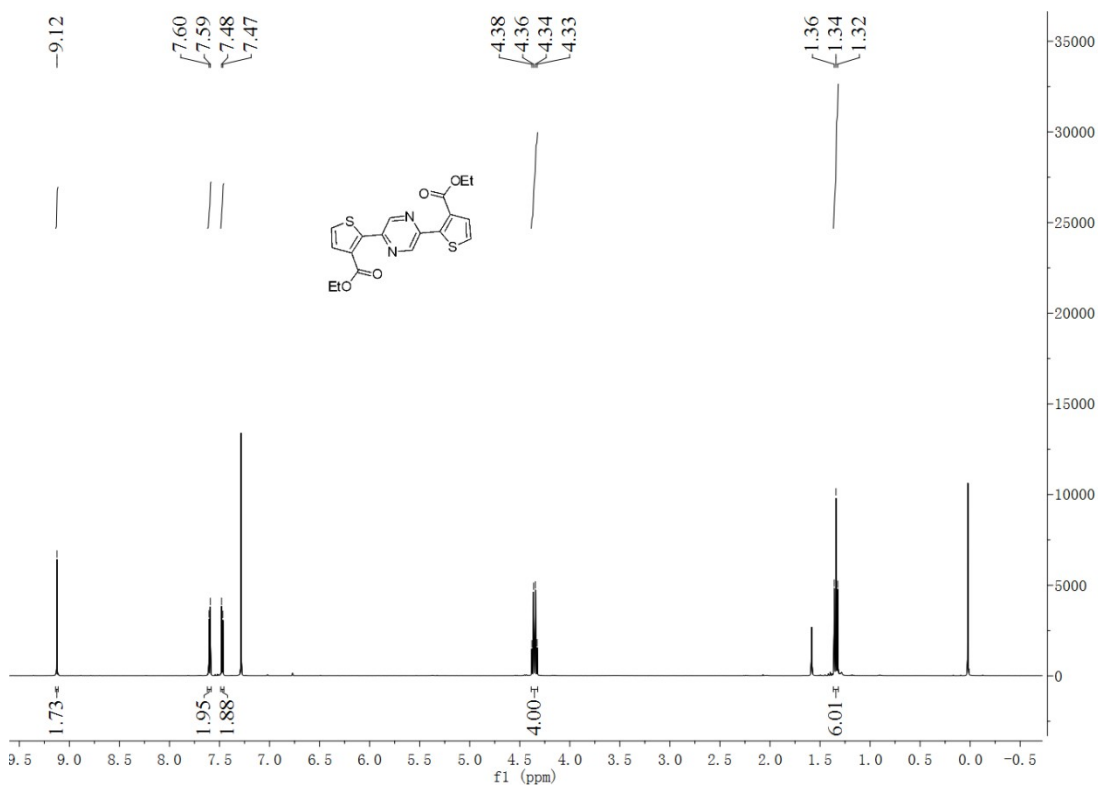

Figure S1 <sup>1</sup>H NMR spectrum of **2** in CDCl<sub>3</sub>

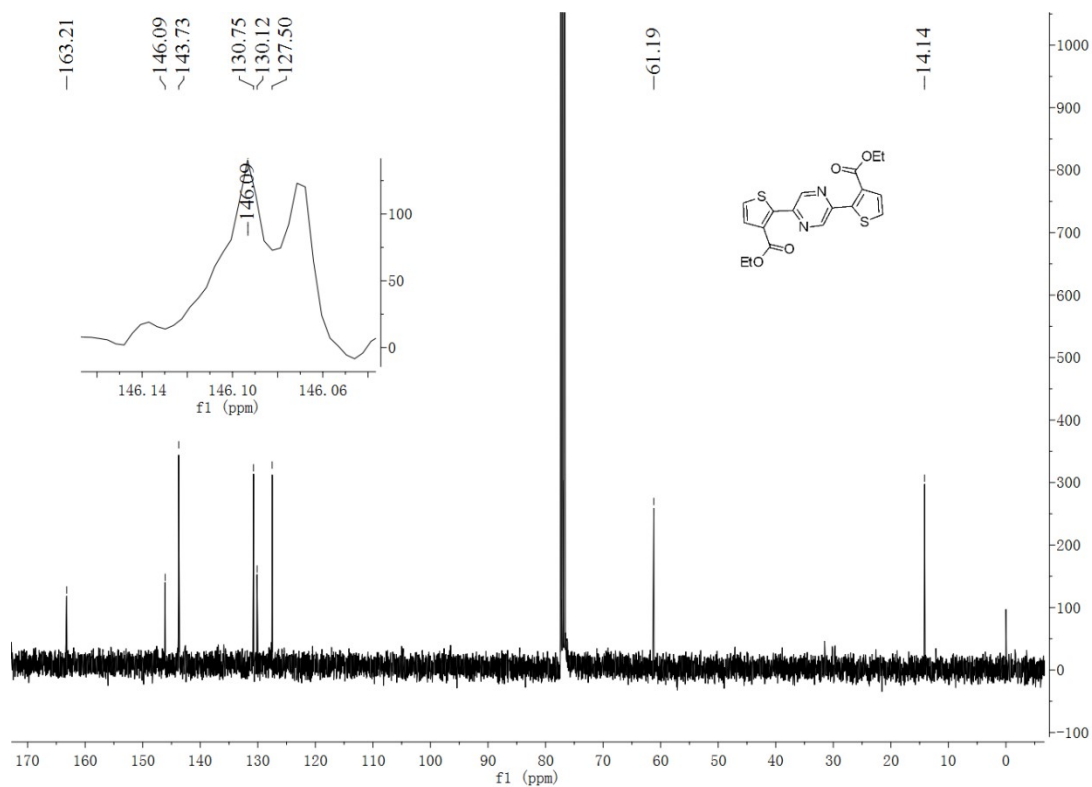

Figure S2  $^{13}\text{C}$  NMR spectrum of **2** in  $\text{CDCl}_3$

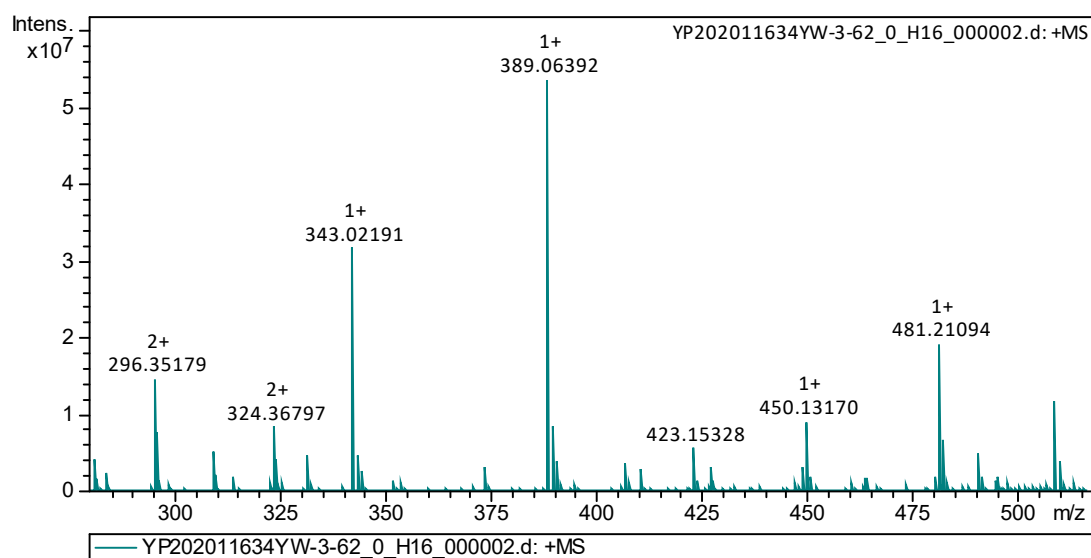

Figure S3 High-resolution MALDI-TOF MS spectrum of **2**

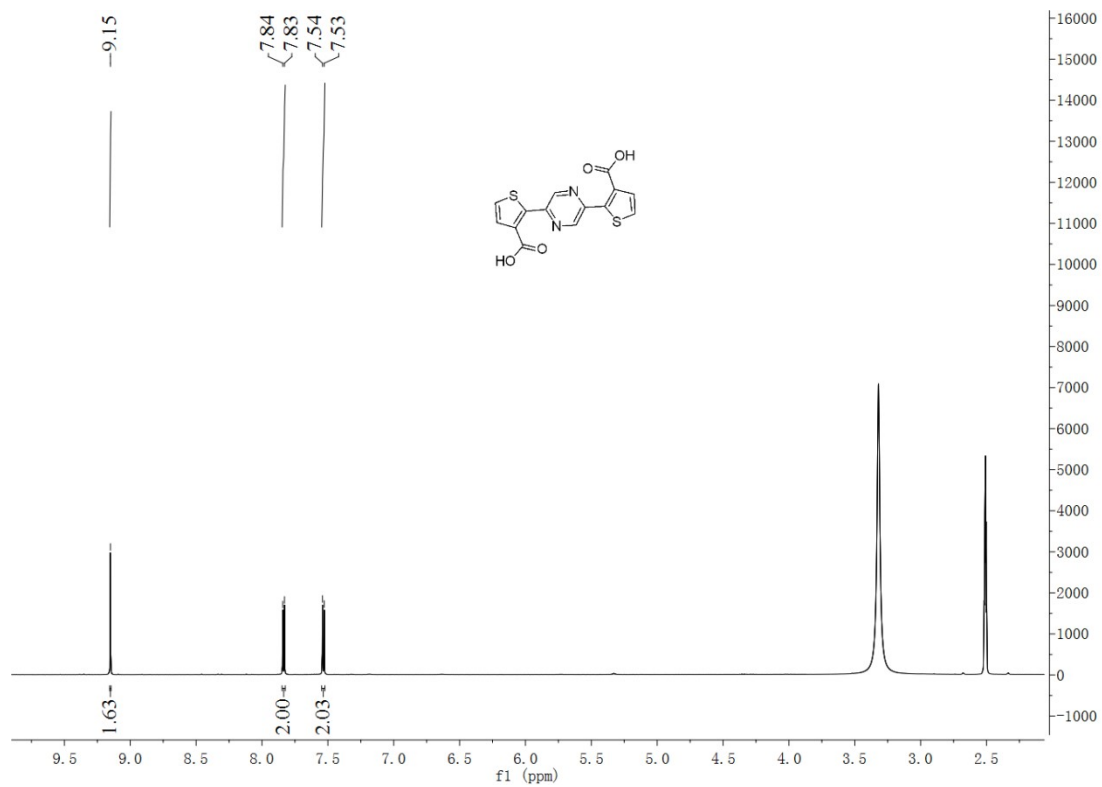

Figure S4  $^1\text{H}$  NMR spectrum of **3** in DMSO.

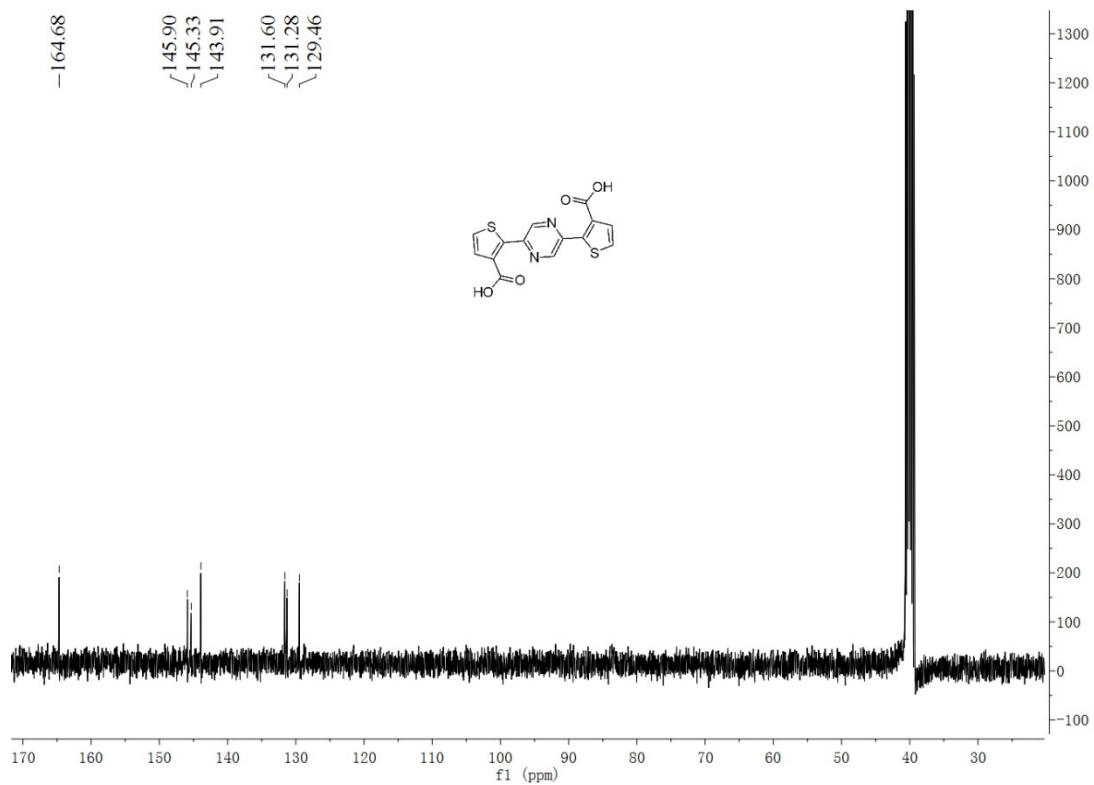

Figure S5  $^{13}\text{C}$  NMR spectrum of **3** in DMSO

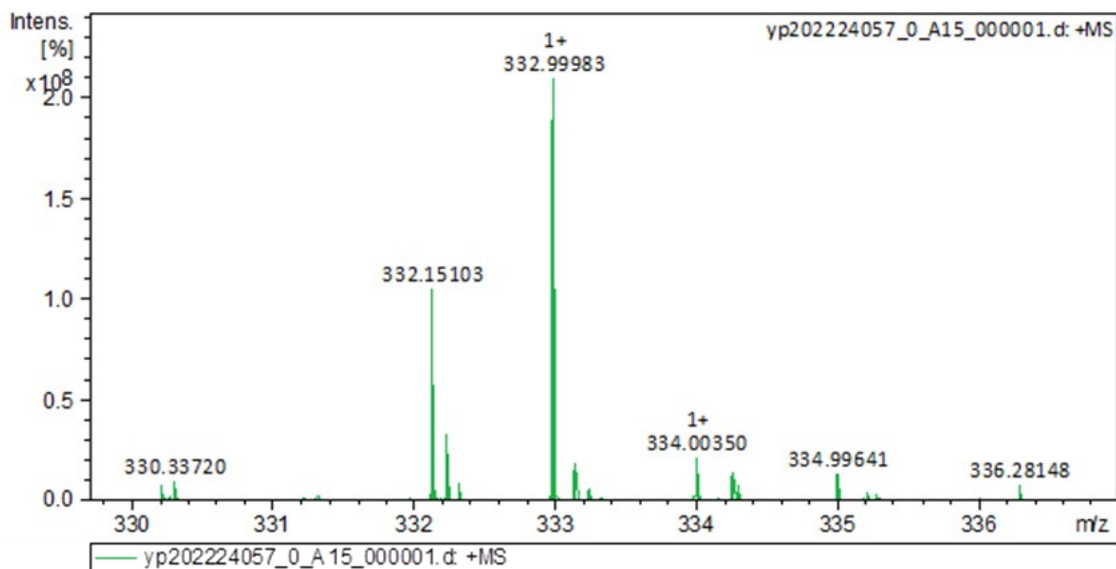

Figure S6 High-resolution MALDI-TOF MS spectrum of **3**

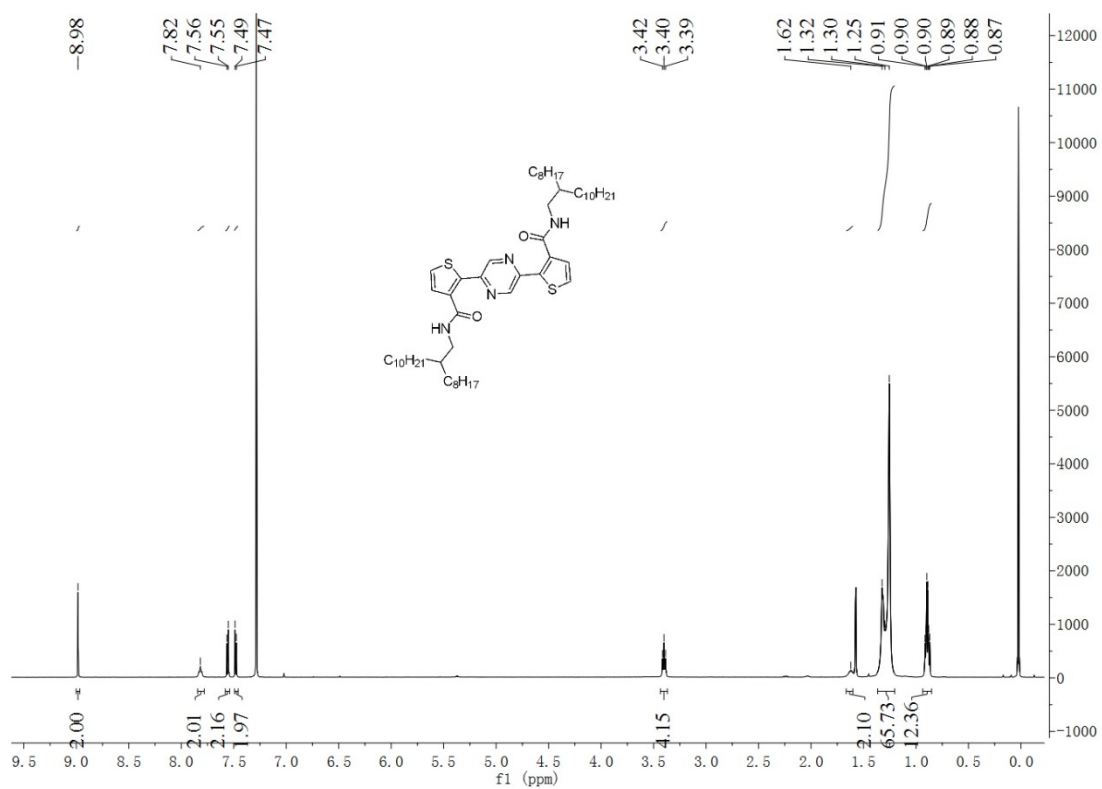

Figure S7 <sup>1</sup>H NMR spectrum of **4** in CDCl<sub>3</sub>.

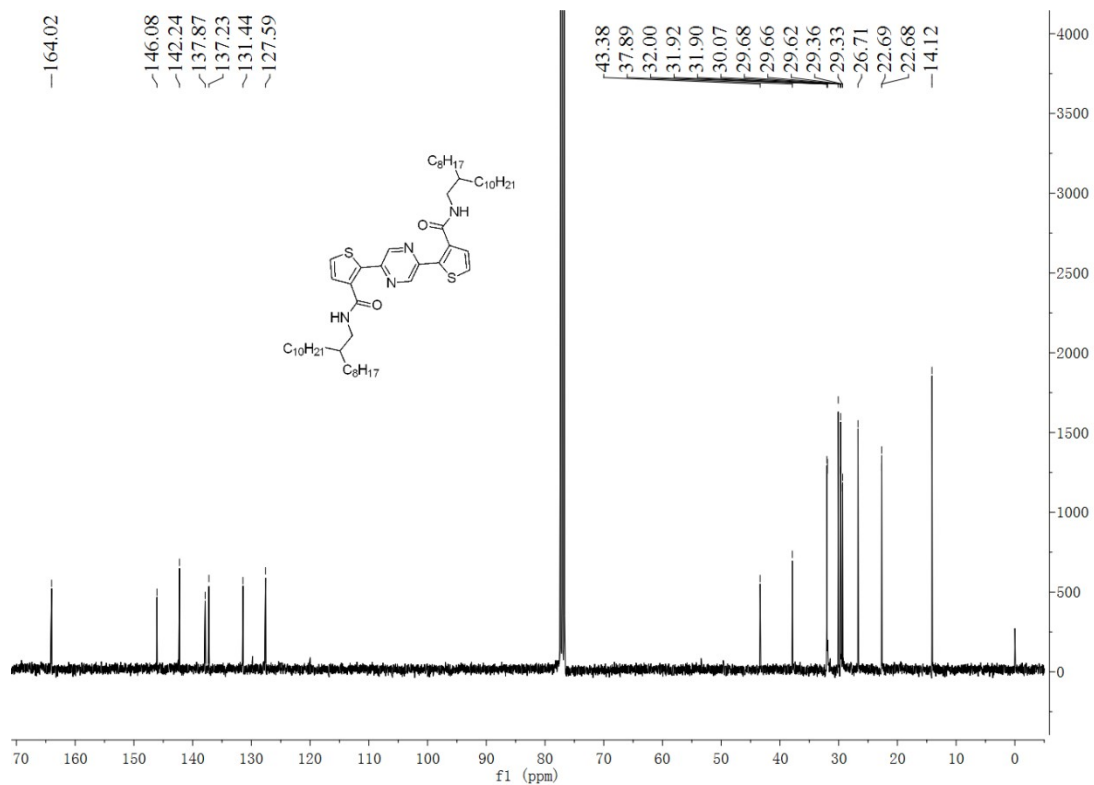

Figure S8  $^{13}C$  NMR spectrum of 4 in  $CDCl_3$

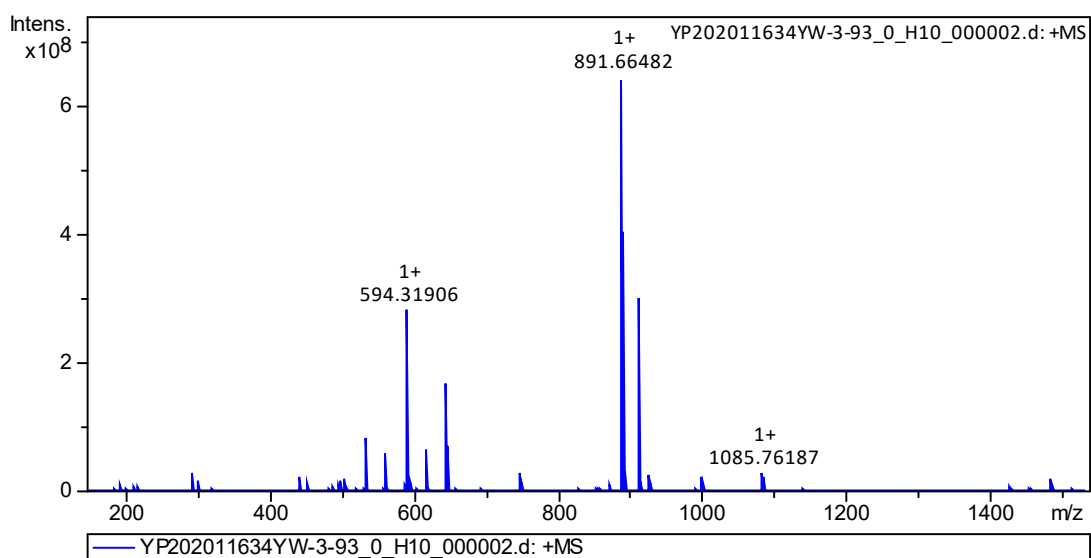

Figure S9 High-resolution MALDI-TOF MS spectrum of 4

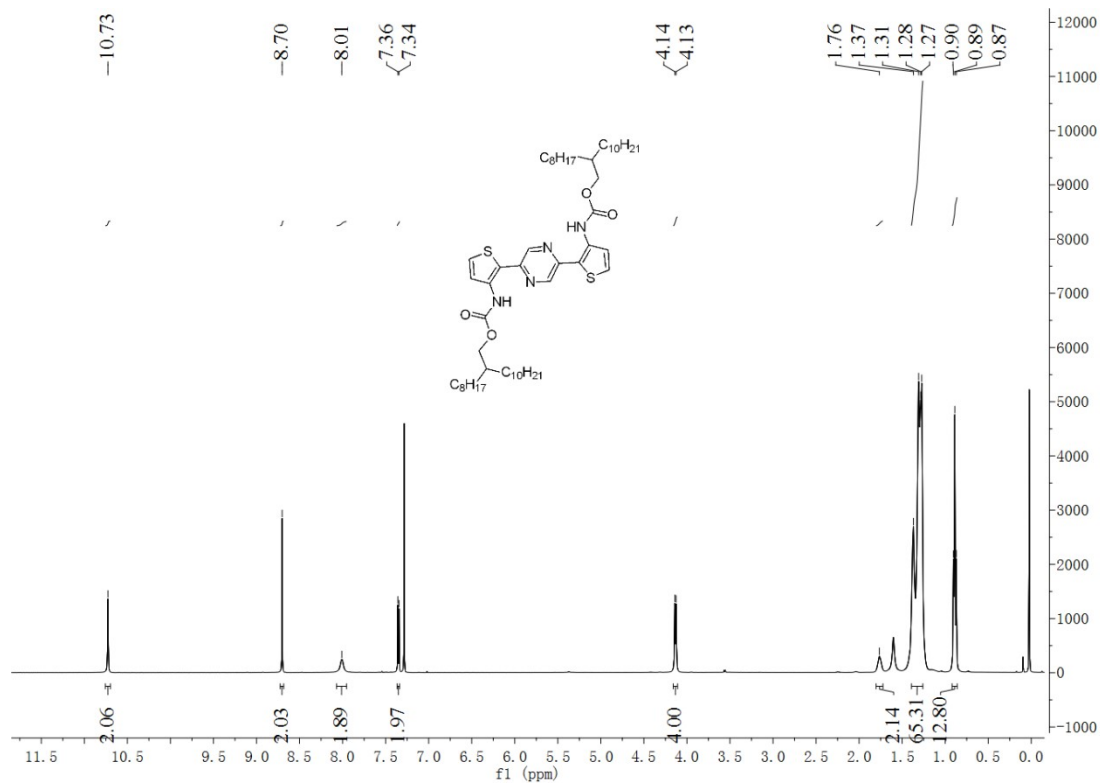

Figure S10 <sup>1</sup>H NMR spectrum of **5** in CDCl<sub>3</sub>.

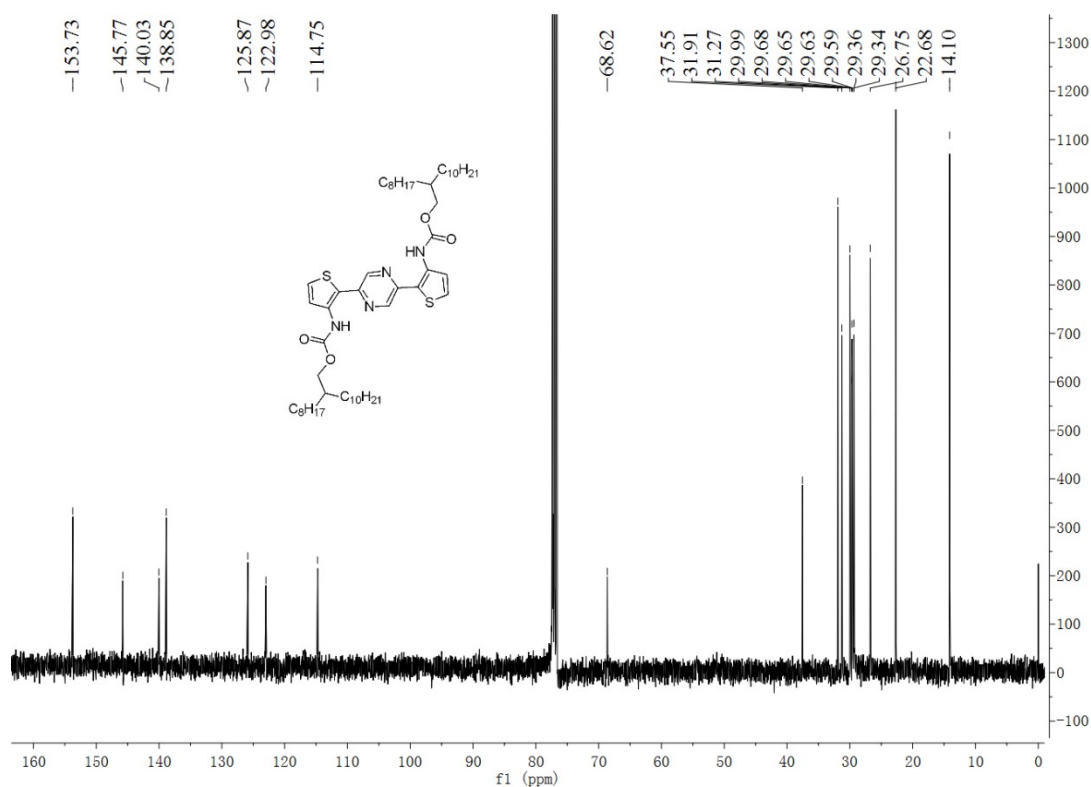

Figure S11 <sup>13</sup>C NMR spectrum of **5** in CDCl<sub>3</sub>

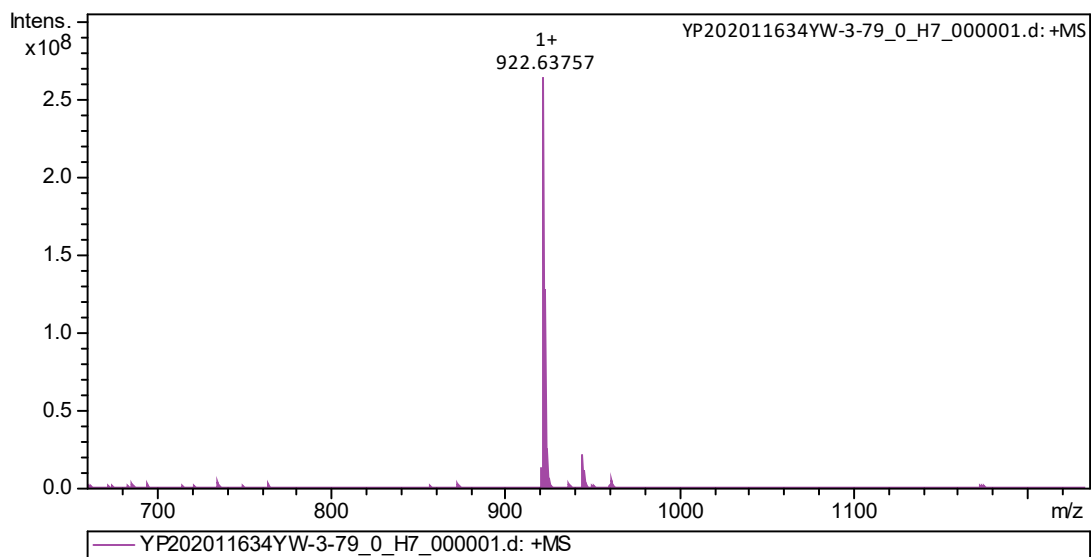

Figure S12 High-resolution MALDI-TOF MS spectrum of **5**

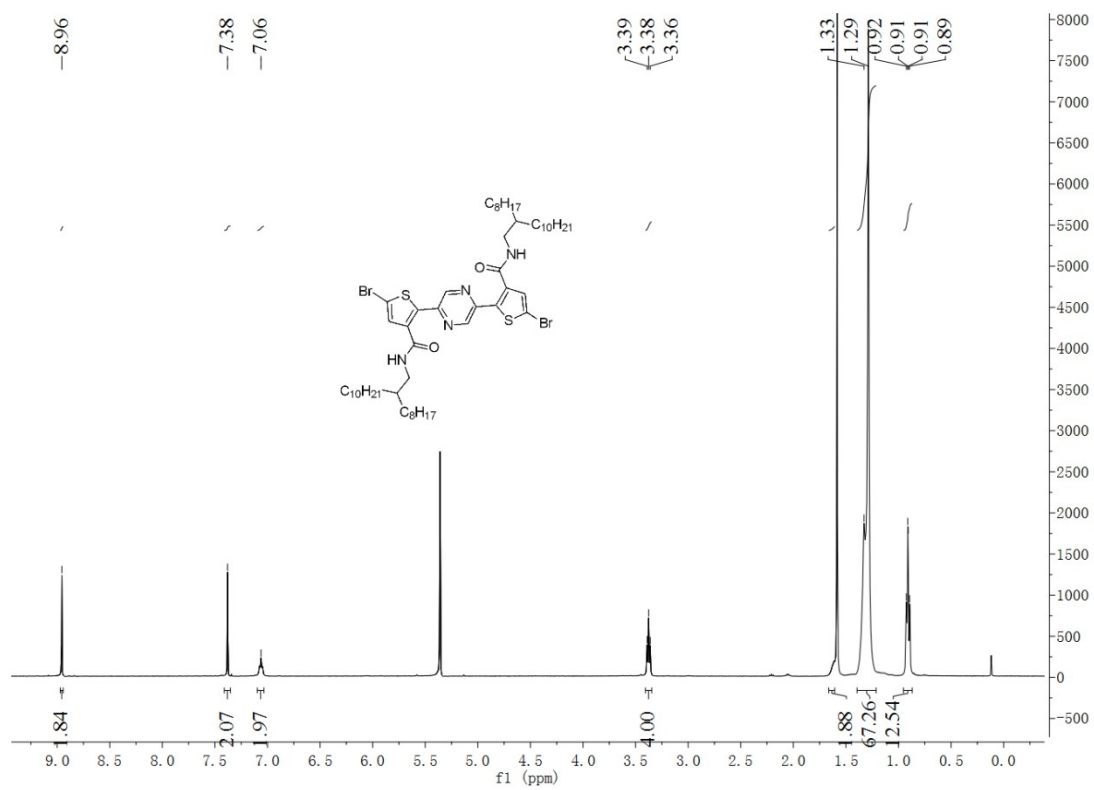

Figure S13 <sup>1</sup>H NMR spectrum of **6** in CDCl<sub>3</sub>.

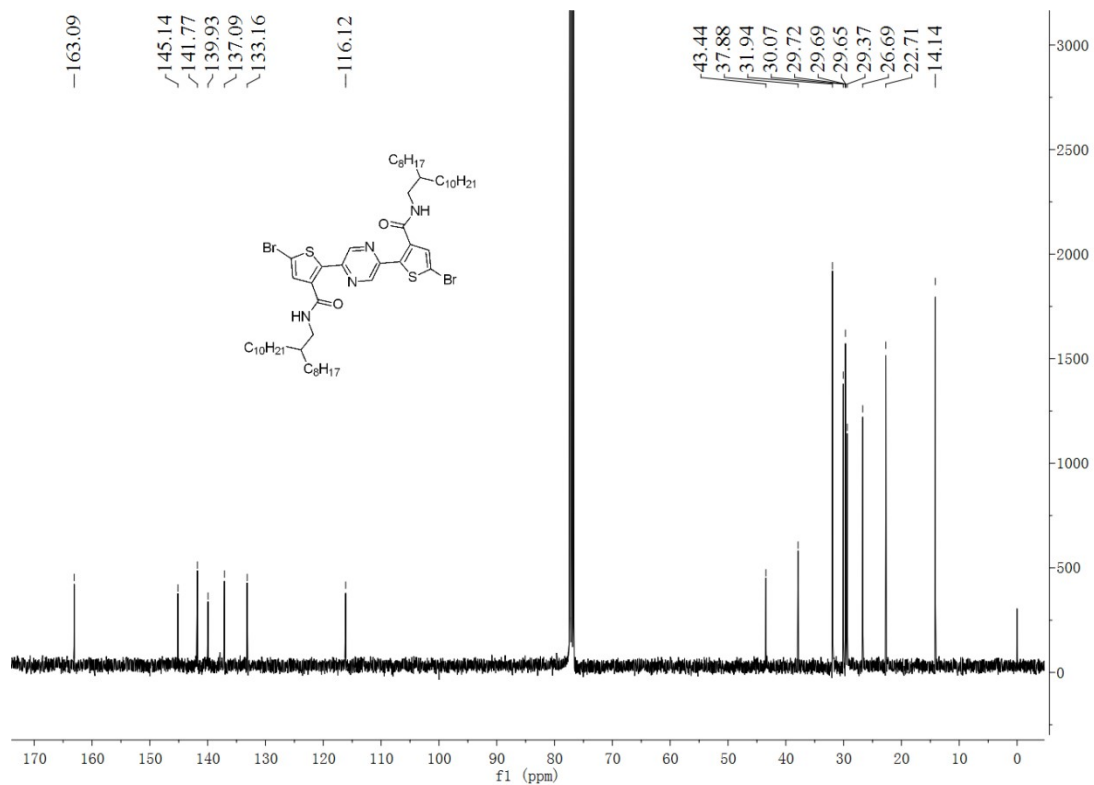

Figure S14  $^{13}C$  NMR spectrum of **6** in  $CDCl_3$

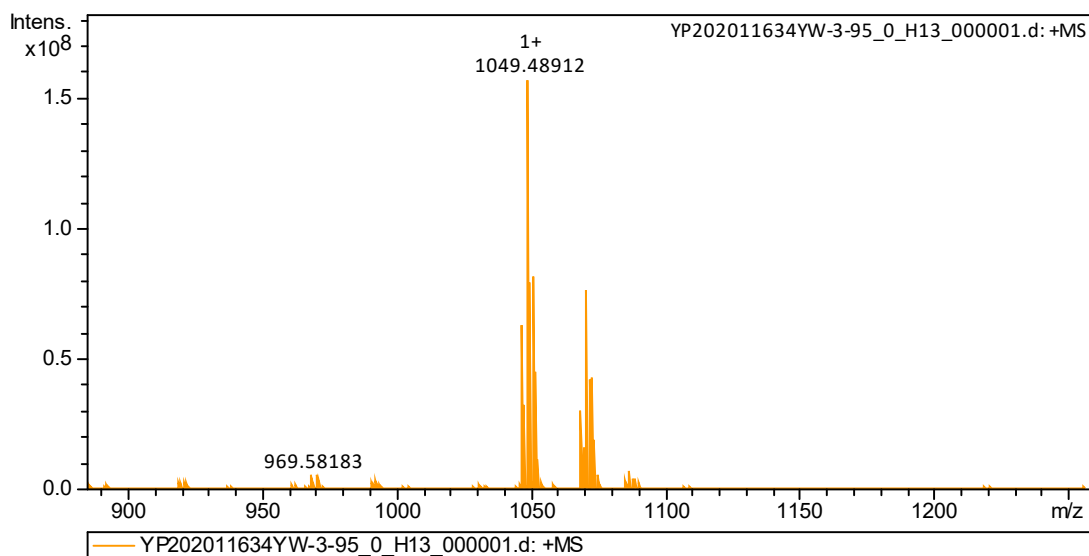

Figure S15 High-resolution MALDI-TOF MS spectrum of **6**



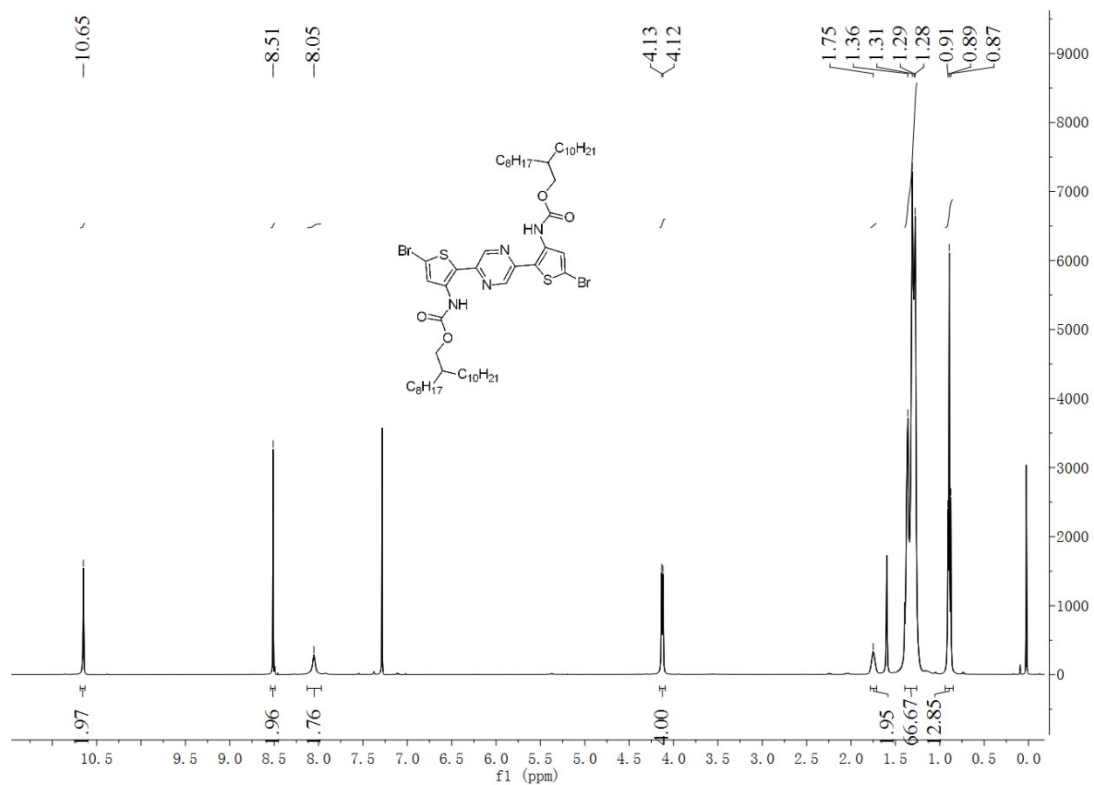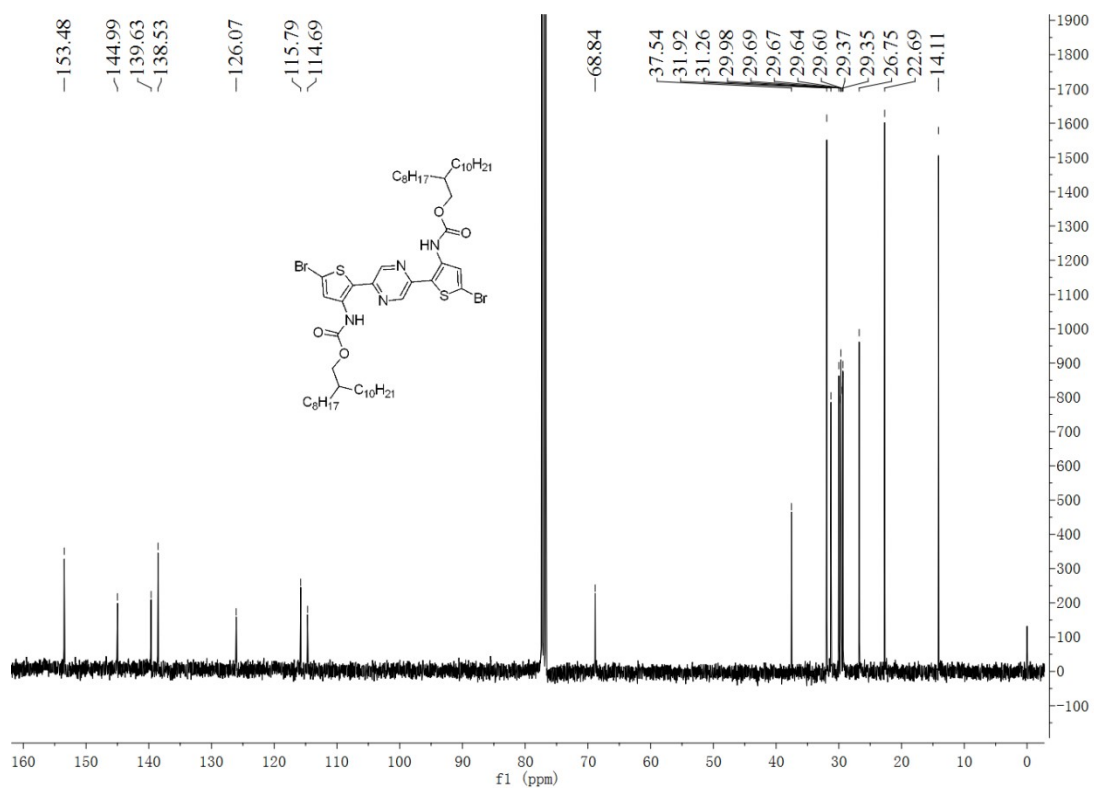

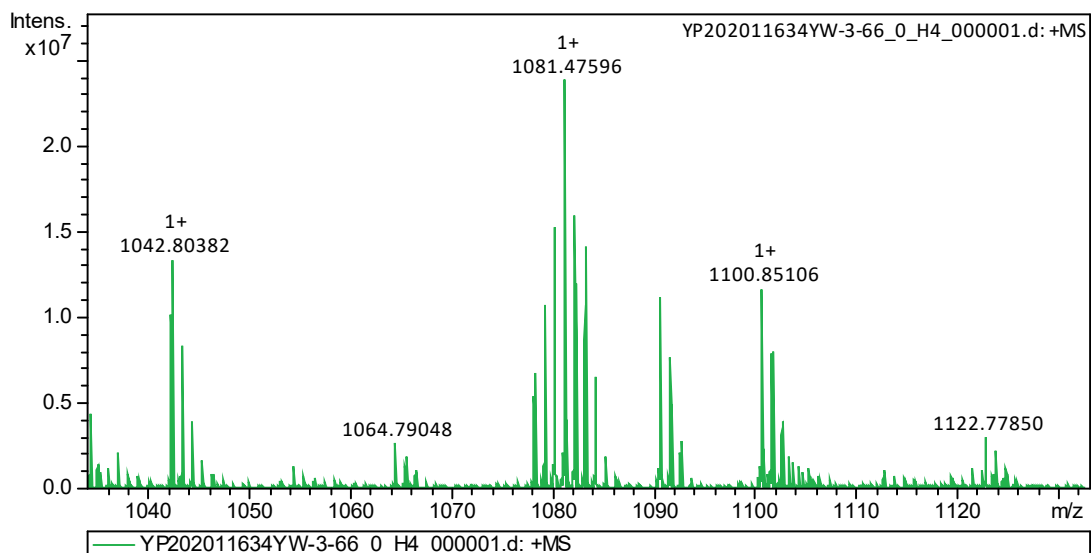

Figure S18. High-resolution MALDI-TOF MS spectrum of **7**

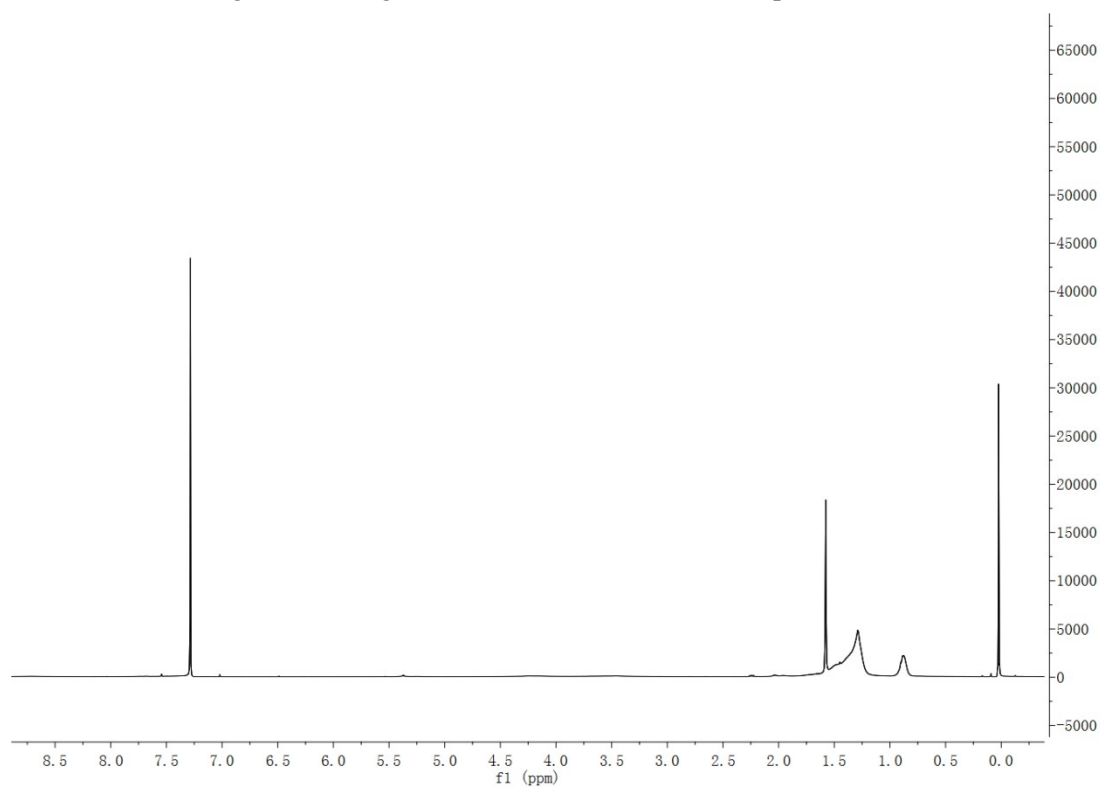

Figure S19.  $^1\text{H}$  NMR spectrum of **PI-BDT1** in  $\text{CDCl}_3$

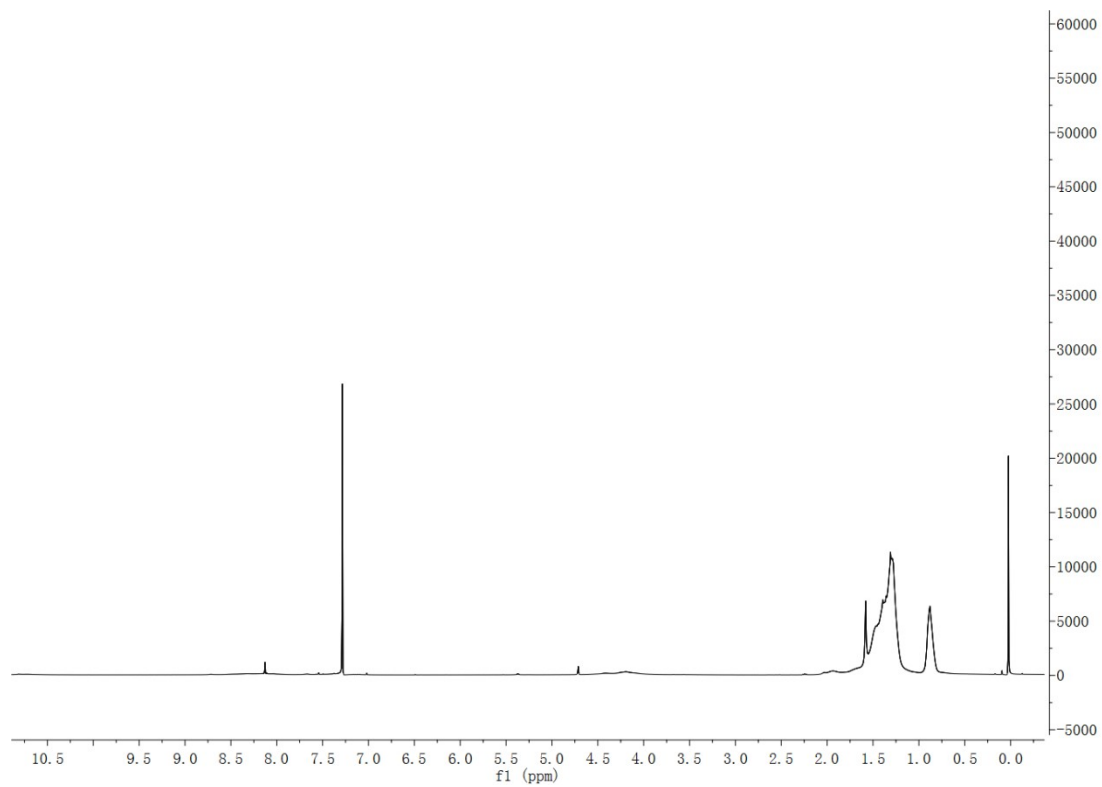

Figure S20.  $^1\text{H}$  NMR spectrum of PC-BDT1 in  $\text{CDCl}_3$

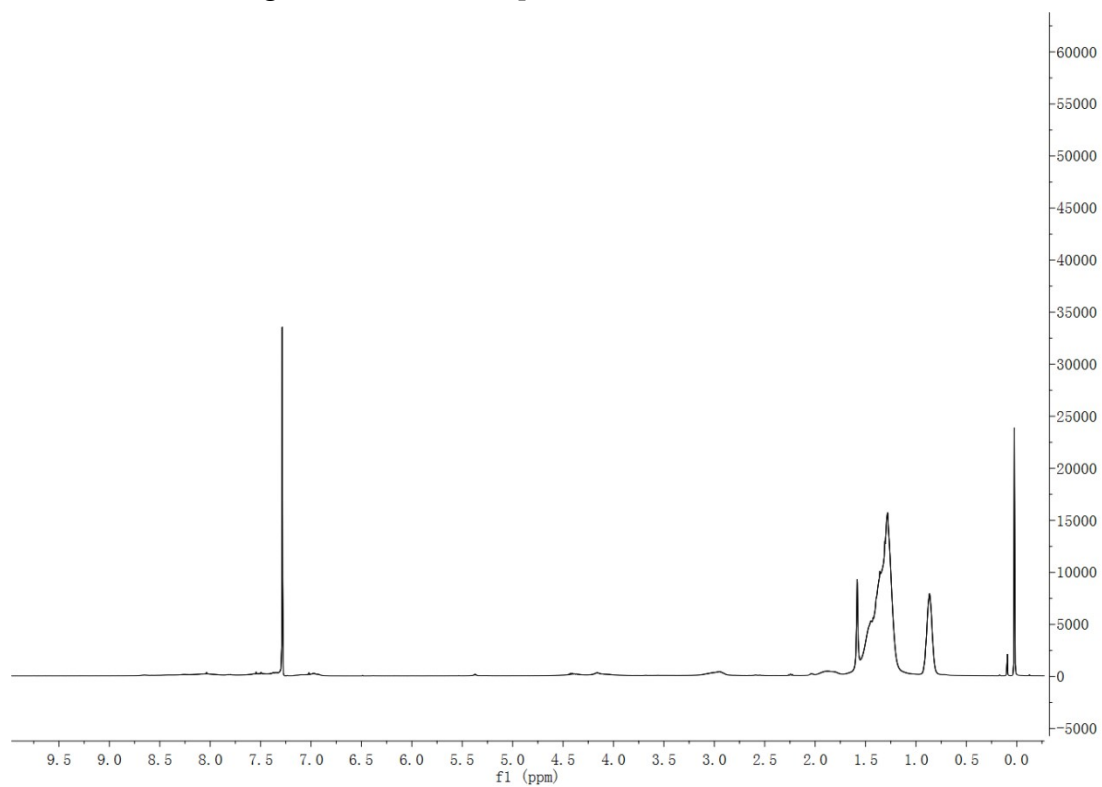

Figure S21.  $^1\text{H}$  NMR spectrum of PC-BDT2 in  $\text{CDCl}_3$

## 2. Crystallographic Results

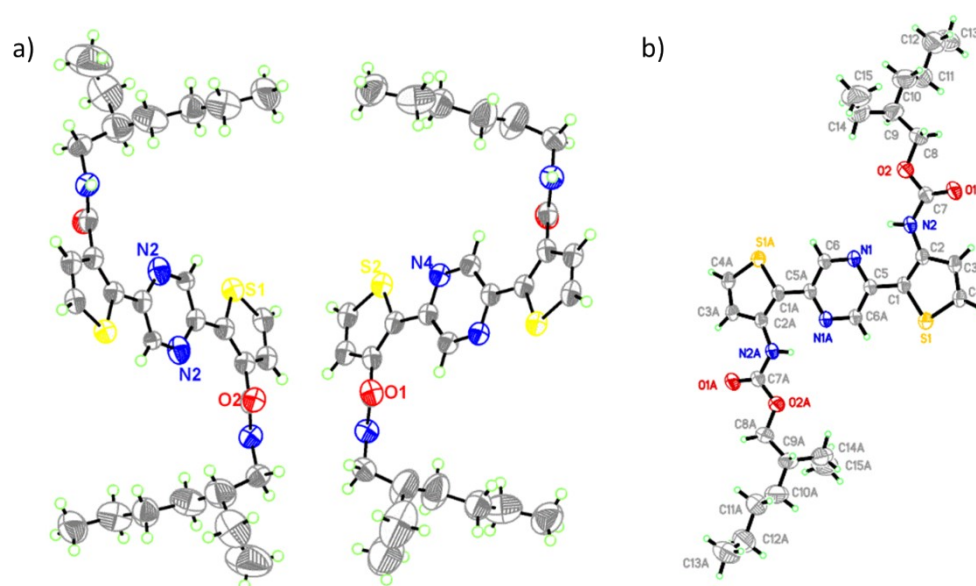

Figure S22. Single-crystal structures of complex **4a** (a) and **5a** (b)

**Table S1.** Crystal data and structure refinement for **4a**

|                                   |                                                                              |
|-----------------------------------|------------------------------------------------------------------------------|
| Empirical formula                 | C <sub>60</sub> H <sub>82</sub> N <sub>8</sub> O <sub>4</sub> S <sub>4</sub> |
| Formula weight                    | 1107.57                                                                      |
| Temperature                       | 173(2) K                                                                     |
| Wavelength                        | 1.54178 Å                                                                    |
| Crystal system, space group       | Triclinic, $P\bar{1}$                                                        |
| Unit cell dimensions              | $a = 5.1062(2)$ Å $\alpha = 82.251(2)^\circ$                                 |
|                                   | $b = 15.6416(6)$ Å $\beta = 89.811(2)^\circ$                                 |
|                                   | $c = 18.7651(7)$ Å $\gamma = 86.607(2)^\circ$                                |
| Volume                            | 1482.45(10) Å <sup>3</sup>                                                   |
| Z, Calculated density             | 1, 1.241 mg/m <sup>3</sup>                                                   |
| Absorption coefficient            | 1.884 mm <sup>-1</sup>                                                       |
| F(000)                            | 594                                                                          |
| Crystal size                      | 0.160 x 0.150 x 0.120 mm                                                     |
| Theta range for data collection   | 2.376 to 71.822°.                                                            |
| Limiting indices                  | $-6 \leq h \leq 6$ , $-19 \leq k \leq 19$ , $-23 \leq l \leq 22$             |
| Reflections collected / unique    | 34605 / 5689 [R(int) = 0.1195]                                               |
| Completeness to theta             | 67.679 99.3 %                                                                |
| Refinement method                 | Full-matrix least-squares on F <sup>2</sup>                                  |
| Data / restraints / parameters    | 5689 / 1 / 351                                                               |
| Goodness-of-fit on F <sup>2</sup> | 1.022                                                                        |

|                                      |                                    |
|--------------------------------------|------------------------------------|
| Final R indices [ $I > 2\sigma(I)$ ] | R1 = 0.1062, wR2 = 0.2796          |
| R indices (all data)                 | R1 = 0.1537, wR2 = 0.3196          |
| Extinction coefficient               | n/a                                |
| Largest diff. peak and hole          | 0.934 and -0.628 e.Å <sup>-3</sup> |

**Table S2.** Crystal data and structure refinement for **5a**

|                                      |                                              |
|--------------------------------------|----------------------------------------------|
| Empirical formula                    | C30 H42 N4 O4 S2                             |
| Formula weight                       | 586.79                                       |
| Temperature                          | 297(2) K                                     |
| Wavelength                           | 1.54178 Å                                    |
| Crystal system, space group          | Triclinic, $P\bar{1}$                        |
| Unit cell dimensions                 | a = 5.1770(4) Å $\alpha = 100.491(4)^\circ$  |
|                                      | b = 10.4037(11) Å $\beta = 97.244(4)^\circ$  |
|                                      | c = 15.1011(11) Å $\gamma = 96.510(4)^\circ$ |
| Volume                               | 785.58(12) Å <sup>3</sup>                    |
| Z, Calculated density                | 1, 1.240 mg/m <sup>3</sup>                   |
| Absorption coefficient               | 1.885 mm <sup>-1</sup>                       |
| F(000)                               | 314                                          |
| Crystal size                         | 0.160 x 0.150 x 0.120 mm                     |
| Theta range for data collection      | 4.365 to 68.145°                             |
| Limiting indices                     | -6 ≤ h ≤ 6, -12 ≤ k ≤ 12, -18 ≤ l ≤ 18       |
| Reflections collected / unique       | 11547 / 2855 [R(int) = 0.0446]               |
| Completeness to theta                | 67.679 99.3 %                                |
| Refinement method                    | Full-matrix least-squares on F <sup>2</sup>  |
| Data / restraints / parameters       | 2855 / 1 / 187                               |
| Goodness-of-fit on F <sup>2</sup>    | 1.356                                        |
| Final R indices [ $I > 2\sigma(I)$ ] | R1 = 0.0978, wR2 = 0.3007                    |
| R indices (all data)                 | R1 = 0.1086, wR2 = 0.3232                    |
| Extinction coefficient               | n/a                                          |
| Largest diff. peak and hole          | 0.545 and -0.357 e.Å <sup>-3</sup>           |

### 3. Thermal Analyses of Polymers

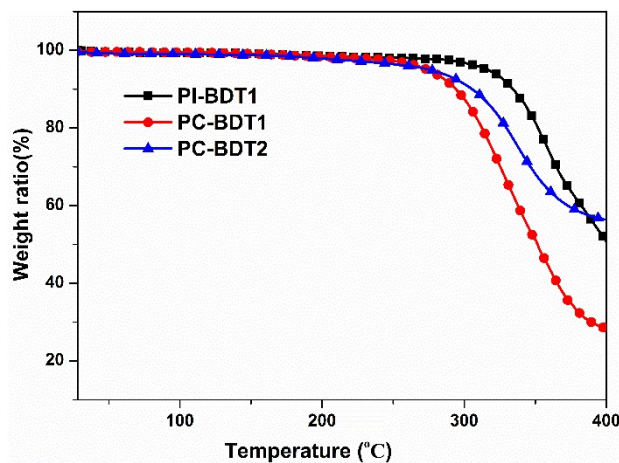

Figure S23. Thermogravimetric analysis (TGA) analysis of **PI-BDT1**, **PC-BDT1** and **PC-BDT2**.

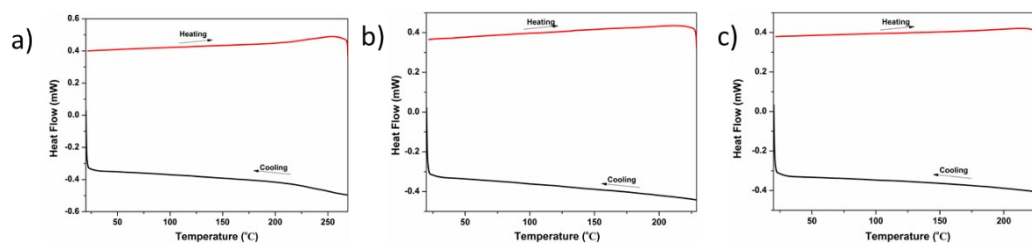

Figure S24. Differential scanning calorimetry (DSC) analysis of **PI-BDT1** (a), **PC-BDT1** (b) and **PC-BDT2** (c).

### 4. Ultraviolet photoelectron spectroscopy (UPS)

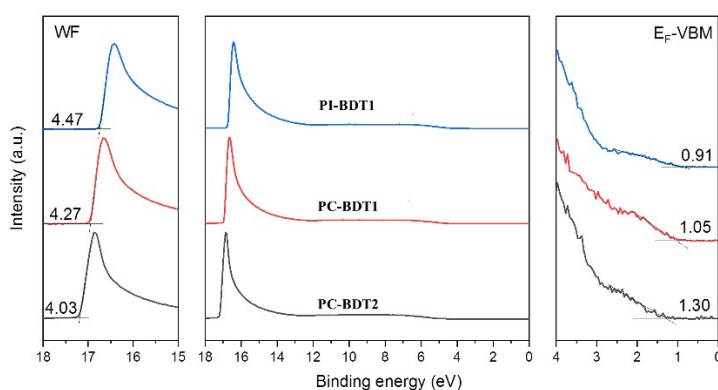

Figure S25. Ultraviolet photoelectron spectroscopy (UPS) of **PI-BDT1**, **PC-BDT1** and **PC-BDT2** thin films.

## 5. Photovoltaic Device Parameters

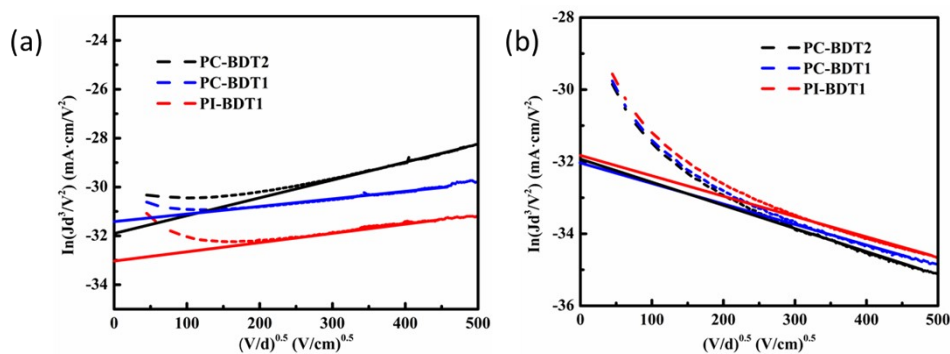

Figure S26. Characteristics of hole-only (a) and electron-only (b) devices for the measurement of the charge carrier transport in **PI-BDT1**, **PC-BDT1** and **PC-BDT2:Y6** blends by the SCLC method.

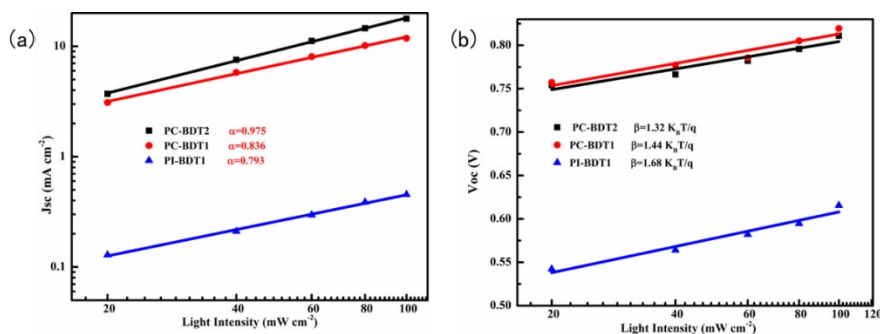

Figure S27. (a) Light intensity dependence of  $J_{SC}$  and (b) Light intensity dependence of  $V_{OC}$  of the solar cells.

## 6. Two-dimensional grazing incidence wide-angle X-ray scattering analysis

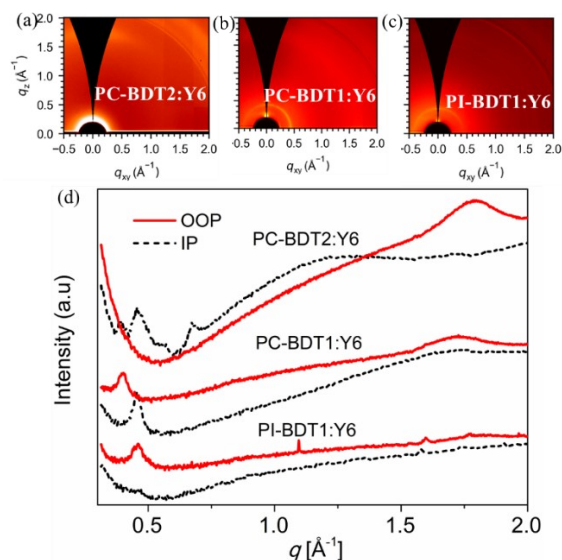

Figure S28. 2D GIWAXS patterns of the blend films (a) **PC-BDT2:Y6**, (b) **PC-BDT1:Y6**, (c) **PI-BDT1:Y6**, and (d) 1D GIWAXS profiles of corresponding blend

films along the out-of-plane (OOP, in red) and in-plane (IP, in black) directions.
